# Supplementary material
Source: ML conference proceedings conference paper supplement (https://proceedings.neurips.cc/paper_files/paper/2020/hash/212ab20dbdf4191cbcdcf015511783f4-Abstract.html)
Supplement: Supplementary file [file 212ab20dbdf4191cbcdcf015511783f4-Supplemental.zip]

---

# Co-exposure maximization in online social networks

## Supplementary material

---

**Sijing Tu**

Department of Computer Science  
KTH Royal Institute of Technology  
Stockholm, Sweden  
sijing@kth.se

**Cigdem Aslay**

Department of Computer Science  
Aarhus University  
Aarhus, Denmark  
cigdem@cs.au.dk

**Aristides Gionis**

Department of Computer Science  
KTH Royal Institute of Technology  
Stockholm, Sweden  
argioni@kth.se

### A Proof of Theorem 4.1

*Proof.* We prove this by using an approximation preserving reduction from the MAXIMUM COVERAGE problem. Given a universe  $U = \{x_1, \dots, x_n\}$  of  $n$  elements, a collection  $\mathcal{S} = \{S_1, \dots, S_m\}$  of subsets of  $U$ , and an integer  $k$ , MAXIMUM COVERAGE problem asks to select  $k$  subsets from  $\mathcal{S}$  such that their union has the maximum cardinality.

Given an instance  $\Pi_{MC}$  of the MAXIMUM COVERAGE problem, we construct an instance  $\Pi_{CoEM}$  of CoEM problem as follows. First, we create a directed graph  $G = (V, E)$  with the set  $V$  of nodes containing the ground set  $U$ , a node  $s_i$  for each subset  $S_j \in \mathcal{S}$ , and an additional node  $t$ , i.e.,  $V = \{s_1, \dots, s_m\} \cup \{t\} \cup \{x_1, \dots, x_n\}$ . We define the set  $E$  of edges as  $E = \{(s_j, x_i) \mid x_i \in S_j\} \cup \{(t, x_i) \mid x_i \in U\}$ . Finally, we let  $k_r = 1$ ,  $k_b = k$ , and  $p_{uv}^r = p_{uv}^b = 1$ , for all  $(u, v) \in E$ .

Let  $S_{MC}^* = \{S_{j_1}, \dots, S_{j_k}\}$  denote the optimal solution to MAXIMUM COVERAGE problem on the instance  $\Pi_{MC}$  and let  $OPT_{MC} = |\cup_{S \in S_{MC}^*} S|$ . Likewise, let  $(S_r^*, S_b^*)$  denote the optimal pair of seed sets maximizing the co-exposure in the instance  $\Pi_{CoEM}$  and let  $OPT_{CoEM} = |I(S_r^*) \cap I(S_b^*)|$ . Next, we will show that  $OPT_{MC} = OPT_{CoEM}$ .

First we show that  $OPT_{MC} \leq OPT_{CoEM}$ . Let  $S_{MC}^* = \{S_{j_1}, \dots, S_{j_k}\}$ . Since setting  $S_r = \{t\}$  and  $S_b = \{s_{j_1}, \dots, s_{j_k}\}$  provides a feasible solution to CoEM, we have  $OPT_{MC} = |U \cap (\cup_{i \in [k]} S_{j_i})| = |I(S_r) \cap I(S_b)| \leq OPT_{CoEM}$ .

We now show that  $OPT_{CoEM} \leq OPT_{MC}$ . First, notice that any feasible solution  $(S_r, S_b)$  to CoEM in which node  $t$  is not assigned to  $S_r$  is suboptimal as the number of nodes co-exposed to both campaigns would be upper bounded by the cardinality of the largest subset in  $\mathcal{S}$  for such solutions. It's also easy to see that for any  $S_b \in V \setminus \{t\}$  such that  $S_b \cap \{x_1, \dots, x_n\} \neq \emptyset$ , we can always find another feasible  $S_b'$  by replacing each  $x_i \in S_b$  with a neighbor  $s_j$  of  $x_i$ . Thus, we have  $OPT_{CoEM} = |I(S_r^*) \cap I(S_b^*)| = |U \cap I(S_b^*)| \leq OPT_{MC}$ .

Assume now that there is an approximation algorithm for CoEM problem with a ratio better than  $1 - \frac{1}{e}$ . This implies that we can also approximate the MAXIMUM COVERAGE problem with a ratio better than  $1 - \frac{1}{e}$ , which is a contradiction as shown by Feige et al. Feige [1998].

□

## B Proof of Lemma 4.2

*Proof.* Consider the following toy example. Let  $G = (V, E)$ , where  $V = \{r_1, r_2, b_1, b_2, v_1, v_2\}$ , and  $E = \{(r_1, v_1), (r_2, v_2), (b_1, v_1), (b_2, v_2)\}$  with  $p_e^i = 1$  for all  $e \in E$  and  $i = \{r, b\}$ . Let  $S_r = \{r_1\}$ ,  $S'_r = \{r_2\}$ ,  $S_b = \{b_1\}$ , and  $S'_b = \{b_2\}$ . It follows that  $\mathbb{E}[C(S_r, S_b)] + \mathbb{E}[C(S'_r, S'_b)] = 0$ , while  $\mathbb{E}[C(\emptyset, \emptyset)] + \mathbb{E}[C(S_r \cup S'_r, S_b \cup S'_b)] = 2$ . which contradicts the condition of simple or directed bisubmodularity.  $\square$

## C Proof of Lemma 4.3

*Proof.* For any  $(S_r, S_b) \in O_1$ , we can construct a set  $X \subseteq \mathcal{E}$  by pairing each node in  $S_r$  with at most  $\lceil \frac{k_b}{k_r} \rceil$  different nodes of  $S_b$ . The resulting  $X$  contains  $|S_b|$  pairs and is a member of  $\mathcal{I}$  since it satisfies all the conditions of the set-of-pairs system  $(\mathcal{E}, \mathcal{I})$ . Thus, we have  $O_1 \subseteq O_2$ .  $\square$

## D Proof of Lemma 4.4

*Proof.* Let  $X \subseteq Y \subseteq \mathcal{E}$  and let  $e \in \mathcal{E} \setminus Y$ . First, we show that  $f(\cdot)$  is non-decreasing. Since by definition,  $X \subseteq Y$  indicates that  $X_r \subseteq Y_r$  and  $X_b \subseteq Y_b$ , we have

$$f(X) = |I(X_r) \cap I(X_b)| \leq |I(Y_r) \cap I(Y_b)| \leq f(Y).$$

Next, we show that  $f$  is neither submodular nor supermodular by providing counter examples on a toy graph. Let  $G = (V, E)$  be a directed graph such that  $V = \{r_0, r_1, b_0, b_1, b_2, v_0, v_1, v_2\}$  and  $E = \{(r_0, v_0), (r_0, v_1), (r_1, v_2), (b_0, v_0), (b_0, v_1), (b_1, v_1), (b_2, v_2)\}$ . Let  $p_{uv}^r = p_{uv}^b = 1$ , for all  $(u, v) \in E$ .

We first show that  $f(\cdot)$  is not submodular. Let  $X = \emptyset$ ,  $Y = \{(r_0, b_2)\}$ , and  $e = (r_1, b_0)$ . Then we have  $f(X \cup \{e\}) - f(X) = 0$  while  $f(Y \cup \{e\}) - f(Y) = 3$ .

Now we show that  $f(\cdot)$  is not supermodular. Let  $X = \emptyset$ ,  $Y = \{(r_0, b_1)\}$ ,  $e = (r_0, b_0)$ . Then we have  $f(X \cup \{e\}) - f(X) = 2$ , while  $f(Y \cup \{e\}) - f(Y) = 0$ .  $\square$

## E Proof of Lemma 4.5

*Proof.* We prove the monotonicity and submodularity of  $g(\cdot)$  over a possible world  $w$  sampled from  $\tilde{G} = (V, \tilde{E}, \tilde{p})$ . Let  $X \subseteq Y \subseteq \mathcal{E}$  and let  $e = (e_r, e_b) \in \mathcal{E} \setminus Y$ . We first show that  $g(\cdot)$  is monotone.

$$g(X) = |\cup_{(r,b) \in X} (I(r) \cap I(b))| \leq |\cup_{(r,b) \in Y} (I(r) \cap I(b))| = g(Y).$$

We now show that  $g(\cdot)$  is submodular. Since  $\cup_{(r,b) \in X} (I(r) \cap I(b)) \subseteq \cup_{(r,b) \in Y} (I(r) \cap I(b))$ , for any  $e \in \mathcal{E} \setminus Y$ , it follows that

$$\begin{aligned} g(X \cup \{e\}) - g(X) &= |(I(e_r) \cap I(e_b)) \setminus \cup_{(r,b) \in X} (I(r) \cap I(b))| \\ &\geq |(I(e_r) \cap I(e_b)) \setminus \cup_{(r,b) \in Y} (I(r) \cap I(b))| \\ &= g(Y \cup \{e\}) - g(Y). \end{aligned}$$

Thus,  $g$  is a non-decreasing submodular function.  $\square$

## F Proof of Lemma 4.6

*Proof.* We first prove the connection between  $f$  and  $g$  in any possible world  $w$ .

Given  $X^* \subseteq \mathcal{E}$ , let  $(X_r^*, X_b^*)$  denote the corresponding pair of optimal seed sets. Assume wlog that  $X_r^* = \{r_0, \dots, r_{k_r-1}\}$ . Furthermore, let  $\{X_{b_0}^*, \dots, X_{b_{k_r-1}}^*\}$  be any partitioning of  $X_b^*$  into  $k_r$

disjoint sets. Then we have

$$\begin{aligned}
f(X^*) &= |I(X_r^*) \cap I(X_b^*)| = |(\cup_{i=0}^{k_r-1} I(r_i)) \cap (\cup_{j=0}^{k_r-1} I(X_{b_j}))| \\
&= |\cup_{p=0}^{k_r-1} [\cup_{i=0}^{k_r-1} (I(r_i) \cap I(X_{b_{[i+p]\%k_r}}))] | \\
&\leq k_r \max\{|\cup_{i=0}^{k_r-1} (I(r_i) \cap I(X_{b_{[i+0]\%k_r}}))|, \dots, |\cup_{i=0}^{k_r-1} (I(r_i) \cap I(X_{b_{[i+k_r-1]\%k_r}}))|\} \\
&\leq k_r g(X^0).
\end{aligned}$$

Finally, by taking the linear combination over all possible worlds, we have  $\mathbb{E}[f(X^*)] \leq k_r \mathbb{E}[g(X^0)]$ .  $\square$

## G Proof of Lemma 4.7

*Proof.* First, we show that  $(\mathcal{E}, \mathcal{I})$  is an independence system. Let  $X \in \mathcal{I}$ , and let  $Y$  be any set such that  $Y \subseteq X$ . Thus we have  $Y_r \subseteq X_r$  and  $Y_b \subseteq X_b$ , it follows that  $|Y_r| \leq |X_r| \leq k_r$ ;  $|Y| = |Y_b| \leq |X_b| = |X| \leq k_b$  and  $Y_b \cap Y_r \subseteq X_b \cap X_r = \emptyset$ . Besides, for each  $r_0 \in Y_r$ , it follows that  $\cup_{(r_0, b) \in Y} \{b\} \subseteq \cup_{(r_0, b) \in X} \{b\}$ , thus  $|\cup_{(r_0, b) \in Y} \{b\}| \leq \lceil \frac{k_b}{k_r} \rceil$ . In conclusion,  $Y \in \mathcal{I}$ .

Second,  $I$  is not a matroid. Let  $k_r = 1$ ,  $k_b = 2$ , let  $X = \{(1, 2), (1, 4)\}$ , and  $Y = \{(2, 4)\}$ , we have  $|X| - |Y| = 1$ , while neither  $\{(1, 2)\} \cup Y \in \mathcal{I}$  nor  $\{(1, 4)\} \cup Y \in \mathcal{I}$ .

In conclusion,  $(\mathcal{E}, \mathcal{I})$  is an independent system but not a matroid.  $\square$

## H Proof of Lemma 4.8

*Proof.* For any  $A \subseteq \mathcal{E}$ , let  $X$  be the maximum base of  $A$ , let  $Y$  be the minimum base of  $A$ . Thus for  $X$ ,  $|X_r| \geq |X_b| / \lceil \frac{k_b}{k_r} \rceil = |X| / \lceil \frac{k_b}{k_r} \rceil$ . For  $Y$ ,  $|Y_r \cup Y_b| \leq 2|Y_b| = 2|Y|$ .

If  $|X_r| > |Y_r| + |Y_b|$ , then there is a pair that only exists in  $X$ , i.e. there exists  $x \in X \setminus Y$ , such that  $\{x\} \cup Y \in I$ , since both  $x_r$  and  $x_b$  are not in  $Y_r \cup Y_b$ . Thus we have  $|X| / \lceil \frac{k_b}{k_r} \rceil \leq 2|Y|$ , it follows that  $|X| / |Y| \leq 2 \lceil \frac{k_b}{k_r} \rceil$ .  $\square$

## I Proof of Theorem 4.9

*Proof.* Lemmas 4.5 and 4.8 imply that

$$\mathbb{E}[g(X^G)] \geq \frac{1}{1 + 2 \lceil \frac{k_b}{k_r} \rceil} \mathbb{E}[g(X^0)]$$

Furthermore, by using the result in Lemma 4.6, we have

$$\mathbb{E}[f(X_f^G)] \geq \mathbb{E}[g(X^G)] \geq \frac{1}{1 + 2 \lceil \frac{k_b}{k_r} \rceil} \mathbb{E}[g(X^0)] \geq \frac{1}{1 + 2 \lceil \frac{k_b}{k_r} \rceil} \frac{\mathbb{E}[f(X^*)]}{k_r}$$

$\square$

## J Proof of Lemma 5.1

*Proof.* To avoid ambiguity, we use subscriptions  $w$  and  $v$  to denote specific samples drawn from  $\tilde{G}$  and  $V$ , respectively; thus, if  $w$  and  $v$  are given, we write  $g_w(X) = |\cup_{(r, b) \in X} (I_w(r) \cap I_w(b))|$ , and  $R_{v, w} = \{(r, b) : v \in I_w(r) \cap I_w(b)\}$ .

First, it follows by definition that, in a possible world  $w$ ,  $R_{v, w} \cap X \neq \emptyset$  if and only if  $\exists (r, b) \in X$  such that  $v \in I_w(r) \cap I_w(b)$ . Thus, in a possible world  $w$ , we have

$$\begin{aligned}
g_w(X) &= |\{v \in V \mid v \in I_w(r) \cap I_w(b), (r, b) \in X\}| \\
&= |\{v \in V \mid R_{v, w} \cap X \neq \emptyset\}| \\
&= \sum_{v \in V} \mathbb{1}(R_{v, w} \cap X \neq \emptyset)
\end{aligned}$$

where  $\mathbb{1}(R_{v,w} \cap X \neq \emptyset)$  is an indicator variable that takes the value of 1 if  $R_{v,w} \cap X \neq \emptyset$  and 0 otherwise. Then, we have:

$$\begin{aligned}
\mathbb{E}[g(X)] &= \sum_{w \sqsubseteq \tilde{G}} \Pr[w] g_w(X) \\
&= \sum_{w \sqsubseteq \tilde{G}} \Pr[w] \sum_{v \in V} \mathbb{1}(R_{v,w} \cap X \neq \emptyset) \\
&= \sum_{v \in V} \sum_{w \sqsubseteq \tilde{G}} \Pr[w] \mathbb{1}(R_{v,w} \cap X \neq \emptyset) \\
&= n \mathbb{E}[\mathbb{1}(R \cap X \neq \emptyset)]
\end{aligned}$$

where the last equality follows from taking the expectation over the randomness of  $v \sim V$  and  $w \sim \tilde{G}$ .

So far we have shown that for a random RRP-set  $R$ , we have  $\mathbb{E}[\mathbb{1}(R \cap X \neq \emptyset)] = \frac{\mathbb{E}[g(X)]}{n}$ . Then, by using  $F_{\mathcal{R}}(X)$  as an estimator of  $\mathbb{E}[\mathbb{1}(R \cap X \neq \emptyset)]$ , we have:

$$\begin{aligned}
\mathbb{E}[F_{\mathcal{R}}(X)] &= \mathbb{E} \left[ \frac{\sum_{R \in \mathcal{R}} \mathbb{1}(R \cap X \neq \emptyset)}{|\mathcal{R}|} \right] \\
&= \frac{\sum_{R \in \mathcal{R}} \mathbb{E}[\mathbb{1}(R \cap X \neq \emptyset)]}{|\mathcal{R}|} \\
&= \frac{|\mathcal{R}| \cdot \mathbb{E}[\mathbb{1}(R \cap X \neq \emptyset)]}{|\mathcal{R}|} \\
&= \frac{\mathbb{E}[g(X)]}{n}.
\end{aligned}$$

□

## K Proof of Theorem 5.2

We first provide the pseudocode of the greedy pair selection phase of TCEM in Algorithm 1.

---

Algorithm 1: RR-Pairs-Greedy

---

**input** :  $\mathcal{R}, (\mathcal{E}, \mathcal{I})$

**output** :  $\tilde{X}^G$

```

1  $\tilde{X}^G \leftarrow \emptyset$ 
2  $x = \arg \max_{x: \{x\} \cup \tilde{X}^G \in \mathcal{I}} F_{\mathcal{R}}(\tilde{X}^G \cup \{x\}) - F_{\mathcal{R}}(\tilde{X}^G)$ 
3 while  $x \neq \emptyset$  do
4    $\tilde{X}^G = \tilde{X}^G \cup \{x\};$ 
5    $x = \arg \max_{x: \{x\} \cup \tilde{X}^G \in \mathcal{I}} F_{\mathcal{R}}(\tilde{X}^G \cup \{x\}) - F_{\mathcal{R}}(\tilde{X}^G)$ 
6 end
7 return  $\tilde{X}^G$ 

```

---

We now show that  $F_{\mathcal{R}}(\cdot)$  is monotone. Given any  $X \subset \mathcal{E}$  and  $x \in \mathcal{E} \setminus X$ , we have

$$F_{\mathcal{R}}(X \cup \{x\}) = \frac{\sum_{R \in \mathcal{R}} \mathbb{1}[R \cap (X \cup \{x\}) \neq \emptyset]}{|\mathcal{R}|} \geq \frac{\sum_{R \in \mathcal{R}} \mathbb{1}[R \cap X \neq \emptyset]}{|\mathcal{R}|} = F_{\mathcal{R}}(X).$$

Thus,  $F_{\mathcal{R}}(\cdot)$  is monotone.

Next we show that  $F_{\mathcal{R}}(\cdot)$  is submodular. Given any  $X \subseteq Y \subset \mathcal{E}$  and  $x \in \mathcal{E} \setminus Y$ , we have

$$\begin{aligned} F_{\mathcal{R}}(X \cup \{x\}) - F_{\mathcal{R}}(X) &= \frac{\sum_{R \in \mathcal{R}} \mathbb{1}[R \cap (X \cup \{x\}) \neq \emptyset] - \sum_{R \in \mathcal{R}} \mathbb{1}[R \cap X \neq \emptyset]}{|\mathcal{R}|} \\ &= \frac{\sum_{R \in \mathcal{R}} \mathbb{1}[R \cap \{x\} \neq \emptyset, R \cap X = \emptyset]}{|\mathcal{R}|} \\ &\geq \frac{\sum_{R \in \mathcal{R}} \mathbb{1}[R \cap \{x\} \neq \emptyset, R \cap Y = \emptyset]}{|\mathcal{R}|} \\ &= F_{\mathcal{R}}(Y \cup \{x\}) - F_{\mathcal{R}}(Y). \end{aligned}$$

We have shown that  $F_{\mathcal{R}}(\cdot)$  is monotone and submodular. Thus, Algorithm 1 provides  $\left(1 + 2^{\lceil \frac{k_b}{k_r} \rceil}\right)$ -approximation Calinescu et al. [2011] to the problem of maximizing  $F_{\mathcal{R}}(X)$  on the sample  $\mathcal{R}$ ; let  $X^+ := \arg \max_{X \in \mathcal{I}} F_{\mathcal{R}}(X)$  denote the optimal solution of this problem. Then, we have

$$F_{\mathcal{R}}(\tilde{X}^G) \geq \frac{1}{1 + 2^{\lceil \frac{k_b}{k_r} \rceil}} F_{\mathcal{R}}(X^+) \quad (1)$$

Given that  $X^+$  is the optimal solution on the sample, we also have

$$F_{\mathcal{R}}(X^+) \geq F_{\mathcal{R}}(X^0) \quad (2)$$

where  $X^0 = \arg \max_{X \in \mathcal{I}} \mathbb{E}[g(X)]$ .

We remind that  $\text{OPT} = \mathbb{E}[g(X^0)]$  and that the size of the sample  $\mathcal{R}$  is such that  $|nF_{\mathcal{R}}(X) - \mathbb{E}[g(X)]| < \frac{\epsilon}{2} \text{OPT}$  holds for any  $X \in \mathcal{I}_{base}$  with probability at least  $1 - n^{-\ell}/|\mathcal{I}_{base}|$ . Then, by using Eq.s 1 and 2, and a union bound over all  $n^{-\ell}/|\mathcal{I}_{base}|$  estimations, w.p. at least  $1 - n^{-\ell}$  we have:

$$\begin{aligned} \mathbb{E}[g(\tilde{X}^G)] &\geq n F_{\mathcal{R}}(\tilde{X}^G) - \frac{\epsilon}{2} \text{OPT} \\ &\geq \frac{1}{1 + 2^{\lceil \frac{k_b}{k_r} \rceil}} n F_{\mathcal{R}}(X^+) - \frac{\epsilon}{2} \text{OPT} \\ &\geq \frac{1}{1 + 2^{\lceil \frac{k_b}{k_r} \rceil}} n F_{\mathcal{R}}(X^0) - \frac{\epsilon}{2} \text{OPT} \\ &\geq \frac{1}{1 + 2^{\lceil \frac{k_b}{k_r} \rceil}} (\mathbb{E}[g(X^0)] - \frac{\epsilon}{2} \text{OPT}) - \frac{\epsilon}{2} \text{OPT} \\ &\geq \frac{1}{1 + 2^{\lceil \frac{k_b}{k_r} \rceil}} \mathbb{E}[g(X^0)] - \epsilon \text{OPT} \\ &= \left( \frac{1}{1 + 2^{\lceil \frac{k_b}{k_r} \rceil}} - \epsilon \right) \mathbb{E}[g(X^0)] \end{aligned}$$

Finally, by using Lemma 4.6, we obtain

$$\begin{aligned} \mathbb{E}[g(\tilde{X}^G)] &\geq \left( \frac{1}{1 + 2^{\lceil \frac{k_b}{k_r} \rceil}} - \epsilon \right) \mathbb{E}[g(X^0)] \\ &\geq \left( \frac{1}{1 + 2^{\lceil \frac{k_b}{k_r} \rceil}} - \epsilon \right) \frac{\mathbb{E}[f(X^*)]}{k_r} \\ &\geq \left( \frac{1}{(1 + 2^{\lceil \frac{k_b}{k_r} \rceil})k_r} - \epsilon \right) \mathbb{E}[f(X^*)]. \end{aligned}$$

Finally, we note that the running time of Algorithm 1 follows from the running time analysis for the maximum coverage problem; that is, it is linear in the size of the input as each pair in each RRP-set of the sample will be considered at most once, leading to  $\mathcal{O}(\sum_{R \in \mathcal{R}} |R|)$ .

## L Proof of Lemma 5.3

*Proof.* For any  $X \in \mathcal{I}_{base}$ , we have  $|X_r| = k_r$ ,  $|X_b| = k_b$ , and each node in  $X_r$  is paired with  $\tau$  nodes in  $X_b$ . Notice that, there are  $\binom{n}{k_r+k_b}$  ways to select red and blue seed nodes. Once we select  $k_r + k_b$  nodes, we create  $k_r$  groups of at most  $\tau + 1$  nodes, each of which has at most  $\binom{\tau+1}{1}$  ways to create ordered pairings by using the nodes in the group. Thus, we have

$$\begin{aligned} |\mathcal{I}_{base}| &\leq \binom{n}{k_r+k_b} \binom{k_r+k_b}{\tau+1} \binom{\tau+1}{1} \dots \binom{k_r+k_b-(k_r-1)(\tau+1)}{\tau+1} \binom{\tau+1}{1} \\ &= \binom{n}{k_r(\tau+1)} \frac{(k_r(\tau+1))!}{k_r! (\tau!)^{k_r}}. \end{aligned}$$

□

## M Proof of Lemma 5.4

We follow the martingale based framework as in Tang et al. [2015], Aslay et al. [2018].

First we introduce preliminary definitions.

**Definition M.1** (Martingale). *A sequence of random variable  $Y_1, Y_2, Y_3, \dots$  is a martingale, if and only if  $\mathbb{E}[|Y_i|] < +\infty$  and  $\mathbb{E}[Y_i | Y_1, Y_2, \dots, Y_{i-1}] = Y_{i-1}$  for any  $i$ .*

Given a random sample  $\mathcal{R} = \{R_1, \dots, R_\theta\}$ , let  $x_i$  be a binary random variable defined as  $x_i = \mathbb{1}[R_i \cap X \neq \emptyset]$ . By Lemma 5.1, we have  $\frac{\mathbb{E}[g(X)]}{n}$ . Noting that the generation of an RRP-set  $R_i$  is independent of  $R_1, \dots, R_{i-1}$ , we have  $\mathbb{E}[x_i | x_1, \dots, x_{i-1}] = \frac{\mathbb{E}[g(X)]}{n}$ .

Let  $x = \frac{1}{n}\mathbb{E}[g(X)]$ , let  $M_j = \sum_{z=1}^j (x_z - x)$ , so  $\mathbb{E}[M_j] = 0$ , and

$$\begin{aligned} \mathbb{E}[M_j | M_1, \dots, M_{j-1}] &= \mathbb{E}[M_{j-1} + x_j - x | M_1, \dots, M_{j-1}] \\ &= M_{j-1} - x + \mathbb{E}[x_j] \\ &= M_{j-1}, \end{aligned}$$

therefore, the sequence  $M_1, \dots, M_\theta$  is a martingale.

We have shown that  $M_1, \dots, M_\theta$  is a martingale. We now restate a concentration inequality for martingale sequences by Chung and Lu Chung and Lu [2006].

**Lemma M.1.** [Theorem 6.1 Chung and Lu [2006]] *Let  $Y_1, Y_2, \dots$  be a martingale, such that  $Y_1 \leq a$ ,  $Var[Y_1] \leq b_1$ ,  $|Y_z - Y_{z-1}| \leq a$  for  $z \in [2, j]$ , and*

$$Var[Y_z | Y_1, \dots, Y_{z-1}] \leq b_j, \text{ for } z \in [2, j],$$

where  $Var[\cdot]$  denotes the variance. Then, for any  $\gamma > 0$

$$\Pr(Y_j - \mathbb{E}[Y_j] \geq \gamma) \leq \exp\left(-\frac{\gamma^2}{2(\sum_{z=1}^j b_z + a\gamma/3)}\right)$$

We now use Lemma M.1 to get the concentration result for the martingale sequence  $M_1, \dots, M_\theta$ . Since  $x_j \in [0, 1]$  for all  $j \in [1, \theta]$ , we have  $|M_1| = |x_1 - x| \leq 1$  and  $|M_j - M_{j-1}| \leq 1$  for any  $j \in [2, \theta]$ .  $Var[M_1] = Var[x_1]$ , and for any  $j \in [2, \theta]$

$$\begin{aligned} Var[M_j | M_1, \dots, M_{j-1}] &= Var[M_{j-1} + x_j - x | M_1, \dots, M_{j-1}] \\ &= Var[x_j | M_1, \dots, M_{j-1}] \\ &= Var[x_j]. \end{aligned}$$

And for  $Var[x_j]$  we have that

$$\begin{aligned} Var[x_j] &= \mathbb{E}[x_j^2] - \mathbb{E}[x_j]^2 \\ &= x - x^2 \leq x \end{aligned}$$

By using Lemma M.1, for  $M_\theta = \sum_{j=1}^\theta (x_j - x)$ , with  $\mathbb{E}[M_\theta] = 0$ ,  $a = 1$ ,  $b_j = x$ , for  $j = 1, 2, \dots, \theta$ , and  $\gamma = \delta\theta x$ , we have the following corollary.

**Corollary M.1.1.** For any  $\delta > 0$ ,

$$\Pr\left[\sum_{j=1}^{\theta} x_j - \theta x \geq \delta \theta x\right] \leq \exp\left(-\frac{\delta^2}{\frac{2\delta}{3} + 2} \theta x\right).$$

Moreover, for the martingale  $-M_1, \dots, -M_{\theta}$ , we similarly have  $a = 1$  and  $b_j = x$  for  $j = 1, \dots, \theta$ . Note also that  $\mathbb{E}[-M_{\theta}] = 0$ . Hence, for  $-M_{\theta} = \sum_{j=1}^{\theta} (x - x_j)$  and  $\gamma = \delta \theta x$  we can obtain:

**Corollary M.1.2.** For any  $\delta > 0$ ,

$$\Pr\left[\sum_{j=1}^{\theta} x_j - \theta x \leq -\delta \theta x\right] \leq \exp\left(-\frac{\delta^2}{\frac{2\delta}{3} + 2} \theta x\right).$$

We are now ready to prove Lemma 5.4.

*Proof.* Using Corollaries M.1.1 and M.1.2 and letting  $\delta = \frac{\epsilon \text{OPT}}{2nx}$ , we obtain

$$\begin{aligned} \Pr[|nF_{\mathcal{R}}(X) - \mathbb{E}[g(X)]| \geq \frac{\epsilon}{2} \text{OPT}] &= \mathbb{P}\left[\left|\sum_{i=1}^{\theta} x_i - \theta x\right| \geq \frac{\theta \epsilon}{2n} \text{OPT}\right] \\ &\leq 2 \exp\left(-\frac{\delta^2}{\frac{2\delta}{3} + 2} \theta x\right) \\ &= 2 \exp\left(-\frac{3\epsilon^2 \text{OPT}^2}{4n(\epsilon \text{OPT} + 6nx)} \theta\right) \\ &\leq 2 \exp\left(-\frac{3\epsilon^2 \text{OPT}^2}{4n(\epsilon \text{OPT} + 6\text{OPT})} \theta\right) \\ &= 2 \exp\left(-\frac{\epsilon^2 \text{OPT}}{4n(\frac{\epsilon}{3} + 2)} \theta\right), \end{aligned}$$

where the last inequality above follows from the fact that  $nx \leq \text{OPT}$ . Finally, by requiring

$$2 \exp\left(-\frac{\epsilon^2 \text{OPT}}{4n(\frac{\epsilon}{3} + 2)} \theta\right) \leq \frac{1}{n^{\ell} |\mathcal{I}_{base}|},$$

we obtain the lower bound on  $\theta$ . □

## N Proof of Theorem 5.5

We provide the pseudocode of the sampling phase of TCEM in Algorithm 2.

Let  $\beta = \frac{(\frac{2}{3}\epsilon_2 + 2)(l \ln n + \ln \log_2 2n + \ln |\mathcal{I}_{base}|)n}{\epsilon_2^2}$ . To prove Theorem 5.5, we first prove Lemma N.1, Lemma N.2. In these lemmas, we show that we can return a lower bound of OPT with high probability.

**Lemma N.1.** Let  $\tilde{X}$  be the output of Algorithm 1, when the size of sampled  $\mathcal{R}$  is  $\theta$  and

$$\theta > \frac{(\frac{2}{3}\epsilon_2 + 2)(l \ln n + \ln \log_2 2n + \ln |\mathcal{I}_{base}|) n}{\epsilon_2^2 y},$$

if  $\text{OPT} < y$ , then  $nF_{\mathcal{R}}(\tilde{X}) < (1 + \epsilon_2)y$ , with probability at least  $1 - \frac{n^{-\ell}}{\log_2 n}$ .

*Proof.* To prove this, we will show that, when  $\text{OPT} < y$ , the probability that  $nF_{\mathcal{R}}(X) \geq (1 + \epsilon_2)y$  is at most  $\frac{n^{-\ell}}{\log_2 n |\mathcal{I}_{base}|}$ . Let  $X$  be arbitrary  $X \in \mathcal{I}_{base}$  and let  $x = \frac{1}{n} \mathbb{E}[g(X)]$ . Assume that  $\text{OPT} < y$

---

**Algorithm 2: Sampling**


---

**Input** :  $\tilde{G}, \lambda, \beta, \epsilon_2, \tilde{I}$   
**Output** :  $\mathcal{R}$

```

1   $\mathcal{R} \leftarrow \emptyset$ ;
2   $\text{LB} \leftarrow \text{LB}_0$ ;
3  for  $i = 1, \dots, \log_2 n - 1$  do
4  |    $y \leftarrow n/2^i$ ;
5  |    $\theta_i = \frac{\beta}{y}$ ;
6  |   while  $|\mathcal{R}| \leq \theta_i$  do
7  | |    $\mathcal{R} \leftarrow \mathcal{R} \cup \text{GenerateRRP-Set}$ ;
8  | |   end
9  | |    $\tilde{X}_i \leftarrow \text{RR-Pairs-Greedy}(\mathcal{R}, \tilde{I})$ ;
10 | |   if  $n F_{\mathcal{R}}(\tilde{X}_i) \geq (1 + \epsilon_2)y$ , then
11 | | |    $\text{LB} \leftarrow \frac{n F_{\mathcal{R}}(\tilde{X}_i)}{1 + \epsilon_2}$ ;
12 | | |   break;
13 | |   end
14 |   end
15 |    $\theta \leftarrow \lambda/\text{LB}$ ;
16 |   while  $|\mathcal{R}| \leq \theta$  do
17 | |    $\mathcal{R} \leftarrow \mathcal{R} \cup \text{GenerateRRP-Set}$ ;
18 | |   end
19 |   Return  $\mathcal{R}$ ;

```

---

which implies that  $x < \frac{\text{OPT}}{n} < \frac{y}{n}$ , and  $1 < \frac{y}{xn}$ . Notice that by construction  $y \leq n$  since  $y \leftarrow n/2^i$ . Then, by using Corollary M.1.1, we have

$$\begin{aligned}
\Pr[nF_{\mathcal{R}}(X) \geq (1 + \epsilon)y] &= \Pr\left[\theta F_{\mathcal{R}}(X) - \theta x \geq \theta x \left(\frac{(1 + \epsilon_2)y}{nx} - 1\right)\right] \\
&\leq \Pr[\theta F_{\mathcal{R}}(X) - \theta x \geq \theta x \epsilon_2] \\
&\leq \exp\left(-\frac{\epsilon_2^2}{\frac{2}{3}\epsilon_2 + 2}\theta\right) \\
&\leq \exp\left(-\frac{\epsilon_2^2}{\frac{2}{3}\epsilon_2 + 2}\frac{y}{n}\theta\right) \\
&\leq \frac{n^{-\ell}}{\log_2 n |\mathcal{I}_{\text{base}}|}
\end{aligned}$$

Finally by a union bound, we conclude that if  $\text{OPT} < y$ , then  $nF_{\mathcal{R}}(\tilde{X}) < (1 + \epsilon_2)y$  w.p. at least  $1 - \frac{n^{-\ell}}{\log_2 n}$ .  $\square$

**Lemma N.2.** *Let  $\tilde{X}$  be the output of Algorithm 1, when the size of sampled  $\mathcal{R}$  is  $\theta$  and*

$$\theta > \frac{(\frac{2}{3}\epsilon_2 + 2)(l \ln n + \ln \log_2 2n + \ln |\mathcal{I}_{\text{base}}|) n}{\epsilon_2^2 y},$$

*if  $\text{OPT} \geq y$ , then  $nF_{\mathcal{R}}(\tilde{X}) \leq (1 + \epsilon_2)\text{OPT}$  with probability at least  $1 - \frac{n^{-\ell}}{\log_2(n)}$ .*

*Proof.* Let  $X$  be arbitrary  $X \in \mathcal{I}_{\text{base}}$ . Assume that  $\text{OPT} \geq y$ , let  $x = \frac{1}{n}\mathbb{E}[g(X)]$ , thus  $\frac{\text{OPT}}{nx} \geq 1$ . We will now show that when  $\text{OPT} \geq y$ , the probability that  $nF_{\mathcal{R}}(\tilde{X}) > (1 + \epsilon_2)\text{OPT}$  is at most



$\frac{n^{-\ell}}{\log_2 n |\mathcal{I}_{base}|}$ . By using Corollary M.1.2, we obtain

$$\begin{aligned} \mathbb{P}[n F_{\mathcal{R}}(X) > (1 + \epsilon_2)\text{OPT}] &= \Pr \left[ \theta F_{\mathcal{R}}(X) - \theta x > \theta x \left( \frac{(1 + \epsilon_2)\text{OPT}}{nx} - 1 \right) \right] \\ &\leq \exp \left( -\frac{\epsilon_2^2}{3\epsilon_2 + 2} \frac{y}{n} \theta \right) \\ &\leq \frac{n^{-\ell}}{\log_2 n |\mathcal{I}_{base}|} \end{aligned}$$

By taking a union bound, we reach the desired result.  $\square$

Now we prove Theorem 5.5.

*Proof.* Let  $i^* = \lceil \log_2 \frac{n}{\text{OPT}} \rceil$ . We will first show that the probability the stopping condition holds while  $\text{OPT} < y$  is at most  $(i^* - 1)/(n^\ell \log_2 n)$ . Recall that the value of  $y$  is determined by  $n/2^i$  at each iteration  $i$ . Then for any  $i < i^*$ , we have  $y = n/2^i < \text{OPT}$ . Thus, by Lemma N.1 and the union bound over  $i^* - 1$  iterations, the probability that  $\text{OPT} < y$  and  $n F_{\mathcal{R}}(X) \geq (1 + \epsilon_2)y$  is at most  $\frac{i^* - 1}{n^\ell \log_2 n}$ . Furthermore, it follows from Lemma N.2 that the probability that  $\text{OPT} \geq y$  and  $n F_{\mathcal{R}}(\tilde{X}) > (1 + \epsilon_2)\text{OPT}$  is at most  $1/(n^\ell \log_2 n)$ . Hence, when the stopping condition holds, by union bound, the probability that  $\text{OPT} \geq y$  and  $n F_{\mathcal{R}}(\tilde{X}) \leq (1 + \epsilon_2)\text{OPT}$  is at least

$$1 - \left( \frac{i^* - 1}{n^\ell \log_2 n} + \frac{1}{n^\ell \log_2 n} \right) \geq 1 - n^{-\ell}.$$

Then, by Lemma N.2 and the union bound, it follows that w.p. at least  $1 - n^{-\ell}$ , we have

$$\text{OPT} \geq \frac{n F_{\mathcal{R}}(\tilde{X})}{1 + \epsilon} \geq y.$$

Therefore, the algorithm sets  $\text{LB} \leq \text{OPT}$  w.p. at least  $1 - n^{-\ell}$  and returns a sample  $\mathcal{R}$  such that

$$|\mathcal{R}| \geq \frac{\lambda}{\text{LB}} \geq \frac{\lambda}{\text{OPT}}$$

w.p. at least  $1 - n^{-\ell}$ .  $\square$

## O Experiment

### O.1 Experiment Setup

In Table 1, we report the graph statistics on number of nodes, edges and average degree.

Table 1: Statistics of the Datasets

| Dataset  | $n$   | $m$    | $d(G)$ |
|----------|-------|--------|--------|
| Flixster | 28843 | 272786 | 9.4576 |
| Last.FM  | 1372  | 14708  | 10.72  |
| NetHEPT  | 15229 | 62752  | 4.1204 |
| WikiVote | 7115  | 103689 | 14.57  |

**Baseline.** MNI<sup>1</sup> solves  $\arg \max_{X \in \mathcal{I}} |N'(X_r) \cap N'(X_b)|$ , where  $N'(X_i)$  is the union of  $X_i$  and  $X_i$ 's out neighbors, and  $\mathcal{I}$  is given in Definition 3.1. MNI has a similar formulation as the  $f$ ; while MNI only picks the seed nodes that can maximally influence the neighbors without taking further nodes into consideration. We apply this local-based method as a comparison with our global based algorithm TCEM.

### O.2 results

We set  $k_r = 20$ , and  $k_b = 20 : 10 : 200$ , here we use the Matlab grammar for list, e.g.  $k_r = 20 : 10 : 200$  means  $k_r$  ranges from 20 to 200 with increment value 10. The results are put in Figure 1.

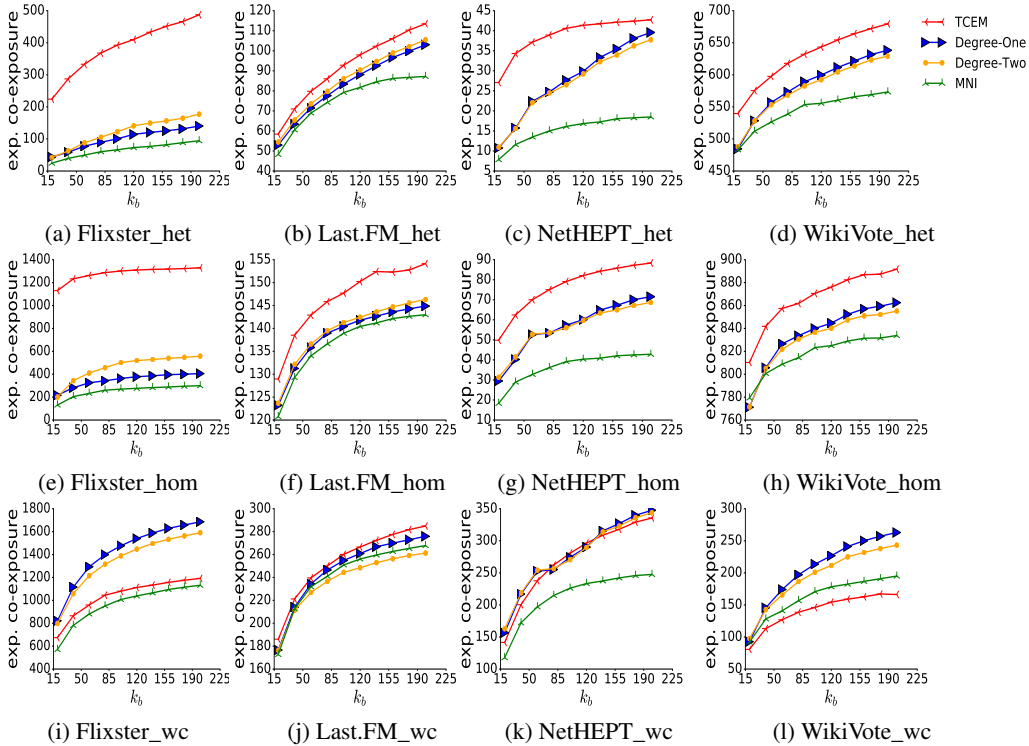

Figure 1: Co-exposure results for different networks for varying  $k_b$ .

<sup>1</sup>Short for *maximum neighborhood intersection*.

We set  $k_b = k_r$ , and  $k_r = 10 : 6 : 64$ . The results are put in Figure 2.

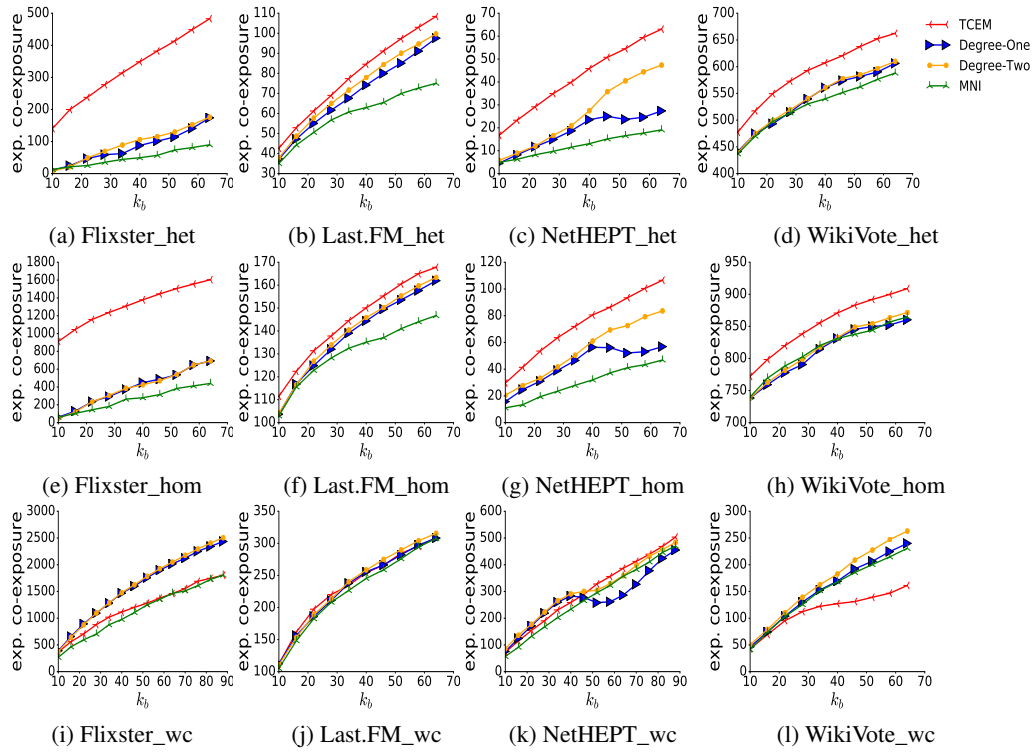

Figure 2: Co-exposure results comparison on fixed  $k_b = k_r$

We set  $k_r = 10 : 6 : 64$ , and  $k_b = 1.5k_r$ . The results are put in Figure 3.

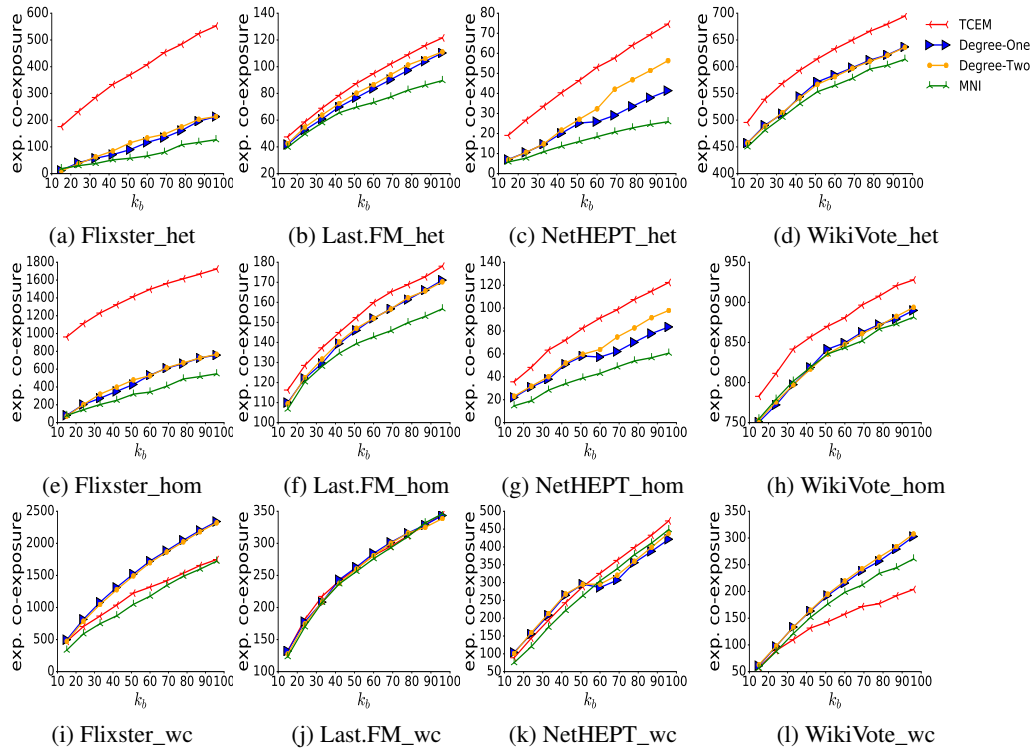

Figure 3: Co-exposure results comparison on fixed  $k_b = 1.5k_r$

We set  $k_r = 10 : 6 : 64$ , and  $k_b = 2k_r$ . The results are put in Figure 5.

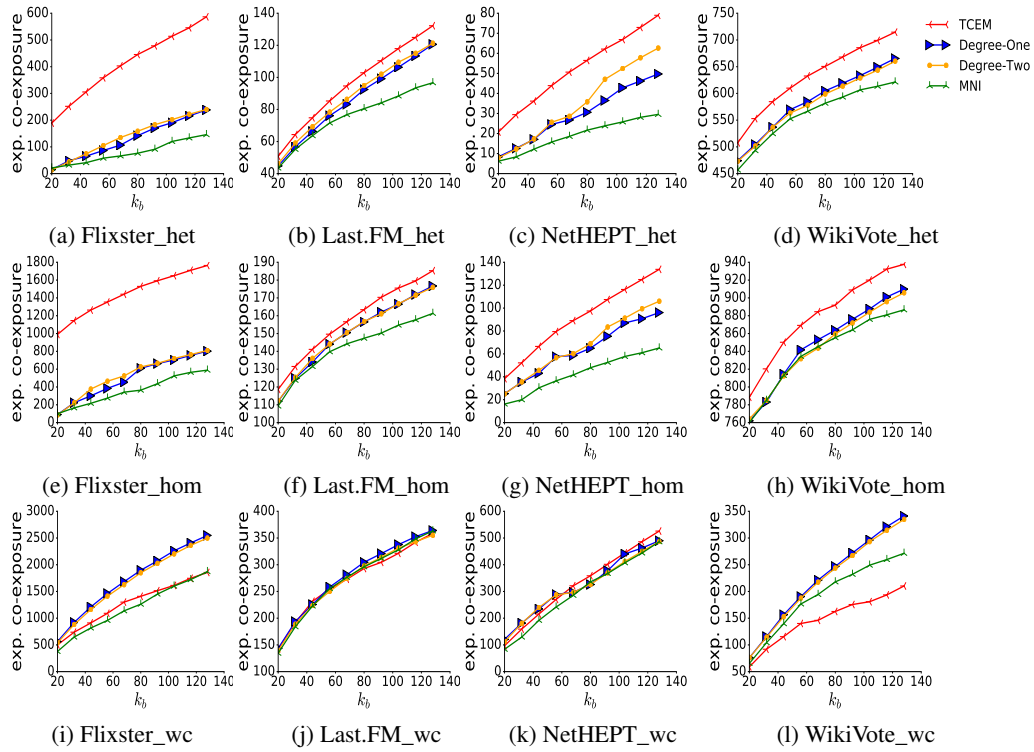

Figure 4: Performance comparison with fixed  $\tau = 2$

We set  $k_r + k_b = 50, 100, 150, 200$ , we first obtain the  $k_r$  and  $k_b$  through implementing BalanceExposure, then we compare the performances of all the algorithms.

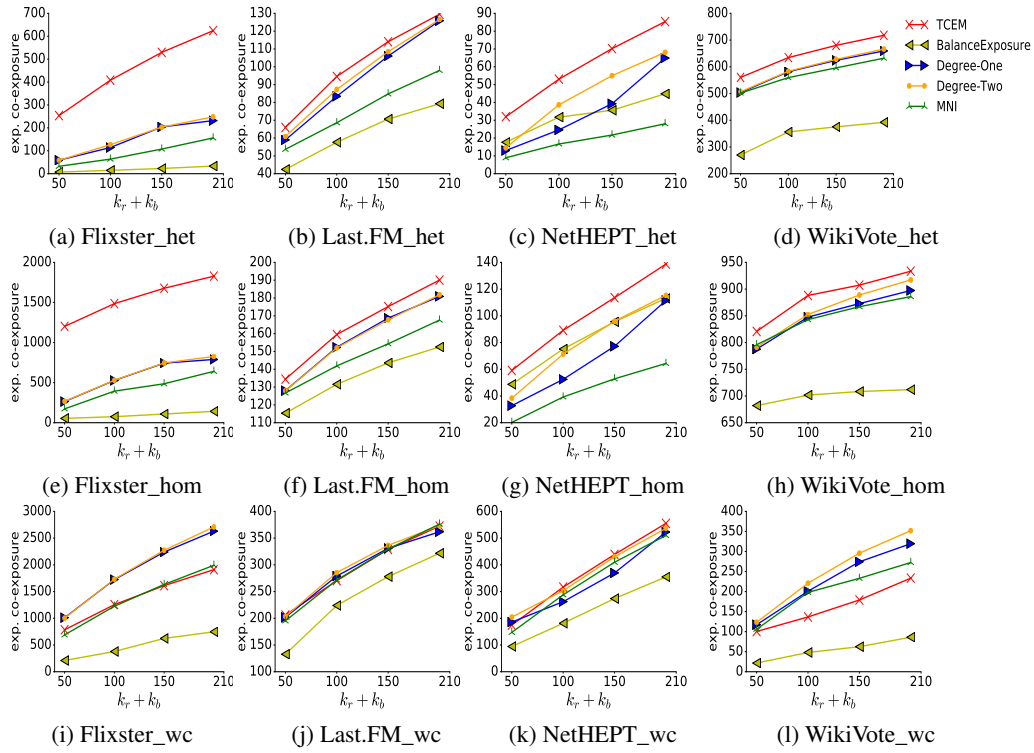

Figure 5: Performance comparison with fixed  $k_r + k_b$

### O.3 Time and Memory

We set  $k_r = 20$ , and  $k_b = 20 : 10 : 200$ . We show the Memory and Time consumption with  $k_r + k_b$  increasing. The results are put in Figure 6, and Figure 7.

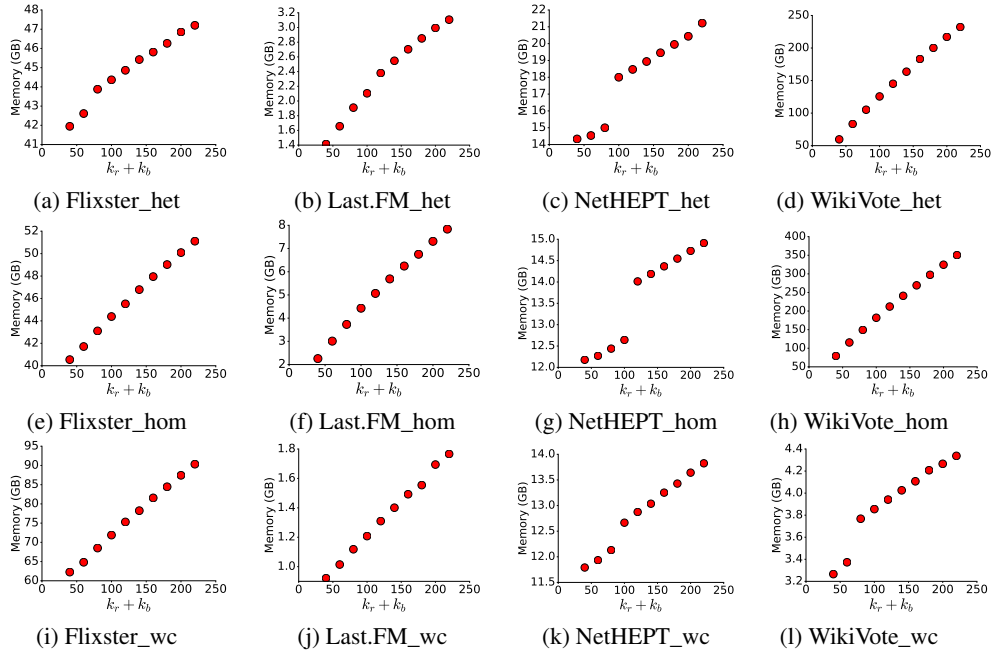

Figure 6: Memory consumption with varying  $k_r + k_b$ .

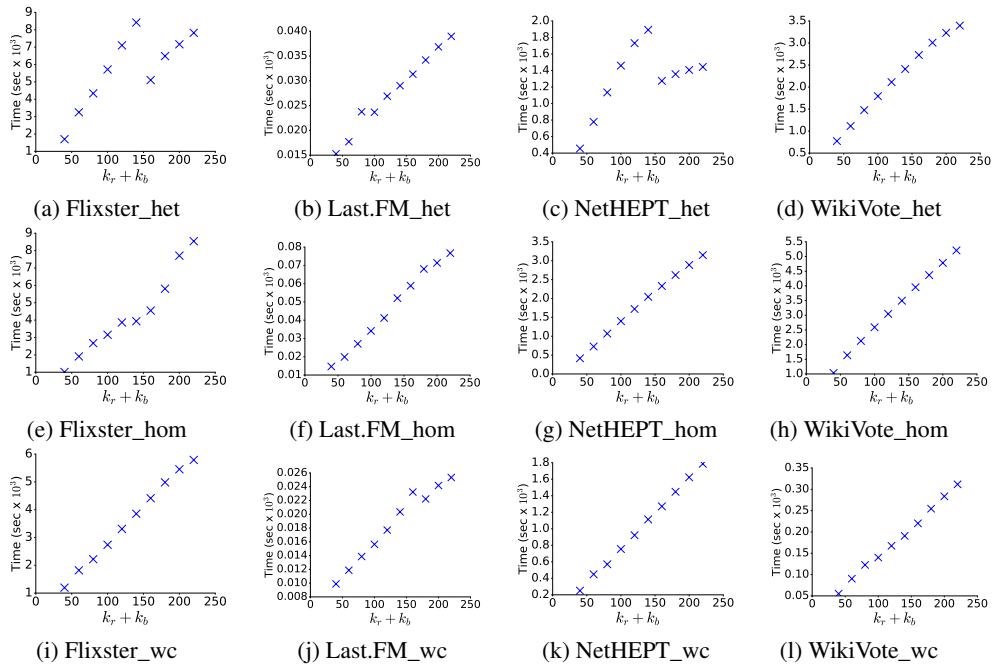

Figure 7: Time consumption with varying  $k_r + k_b$ .

## References

- Cigdem Aslay, Antonis Matakos, Esther Galbrun, and Aristides Gionis. Maximizing the diversity of exposure in a social network. In *2018 IEEE International Conference on Data Mining (ICDM)*, pages 863–868. IEEE, 2018.
- Gruia Calinescu, Chandra Chekuri, Martin Pál, and Jan Vondrák. Maximizing a monotone submodular function subject to a matroid constraint. *SIAM Journal on Computing*, 40(6):1740–1766, 2011.
- Fan Chung and Linyuan Lu. Concentration inequalities and martingale inequalities: a survey. *Internet Mathematics*, 3(1):79–127, 2006.
- Uriel Feige. A threshold of  $\ln n$  for approximating set cover. *Journal of the ACM (JACM)*, 45(4): 634–652, 1998.
- Youze Tang, Yanchen Shi, and Xiaokui Xiao. Influence maximization in near-linear time: A martingale approach. In *Proceedings of the 2015 ACM SIGMOD International Conference on Management of Data*, pages 1539–1554, 2015.
